# Supplementary material for: A critical role for NMDA receptors in parvalbumin interneurons for gamma rhythm induction and behavior
Source: PubMed Central journal article supplement — Mol Psychiatry. 2011 Apr 5;17(5):537–48. doi: 10.1038/mp.2011.31 (PMC3335079; doi:10.1038/mp.2011.31), 2011-04-05
Supplement: mp201131x2.pdf [file mp201131x2.pdf]

## Supplementary Table 1

| Assay                                  | findings in PV-Cre/NR1 f/f mice      |
|----------------------------------------|--------------------------------------|
| <i>anesthetized electrophysiology:</i> |                                      |
| spontaneous oscillations               | ↑ gamma power                        |
| induced oscillations (optogenetics)    | ↓ gamma induction                    |
| <i>awake electrophysiology:</i>        |                                      |
| spontaneous oscillations               | → gamma power; → event; ↑ duration   |
| MK-801                                 | ↓ gamma power                        |
| <i>behavior:</i>                       |                                      |
| open field 7w                          | →                                    |
| open field 11w                         | →                                    |
| open field 11w + MK-801                | → horizontal activity and stereotypy |
| PPI                                    | →                                    |
| habituation                            | ↓                                    |
| cued fear conditioning                 | ↓ freezing                           |
| contextual fear conditioning           | ↓ freezing                           |
| Morris water maze                      | →                                    |
| T-maze                                 | ↓ at 1s, → at 20s, → at 40s          |

gamma power = relative gamma power; ↓ = reduction, → = no significant difference; ↑ = increase

Summary of the findings in PC-Cre/NR1 f/f mice in the assays used.
